# Supplementary material for: Diminished Condensin Gene Expression Drives Chromosome Instability That May Contribute to Colorectal Cancer Pathogenesis
Source: PubMed Central journal article supplement (PMC6721357; doi:10.3390/cancers11081066), 2019-07-28
Supplement: cancers-11-01066-s001.pdf [file cancers-11-01066-s001.pdf]

## SUPPLEMENTARY INFORMATION

### Supplementary Figures

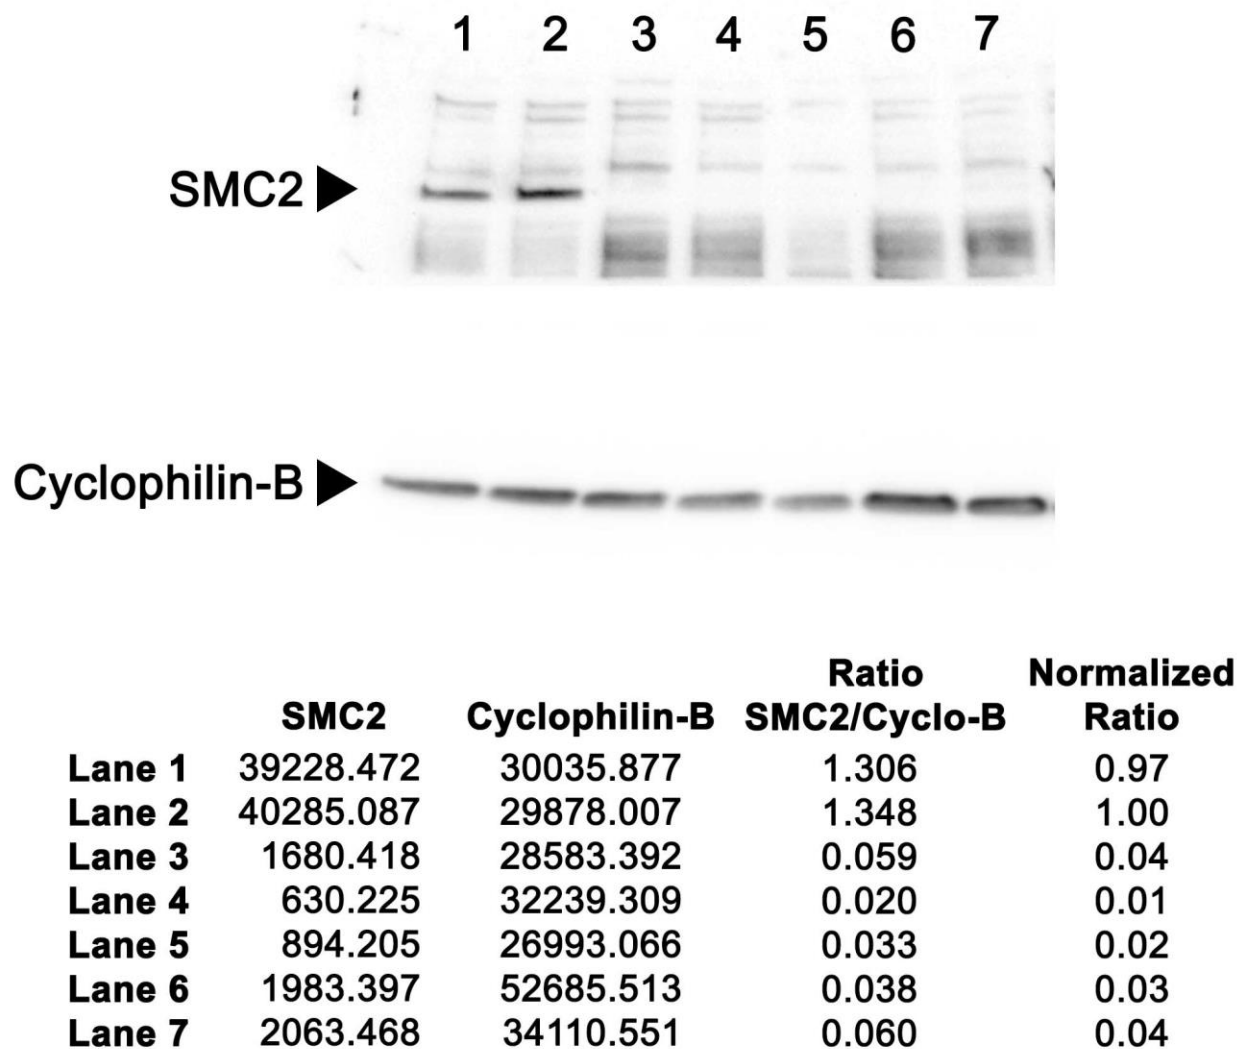

**Figure S1: Raw data of western blots from Figure 3.**

Western blots of SMC2 (top) and Cyclophilin-B (bottom) in HCT116 cells. Densitometry analyses for SMC2 and Cyclophilin-B were performed using Image J and are indicated. The ratios of SMC2/Cyclophilin-B is shown for each lane, as are the normalized ratios, which are presented relative to the siControl (Lane 2).

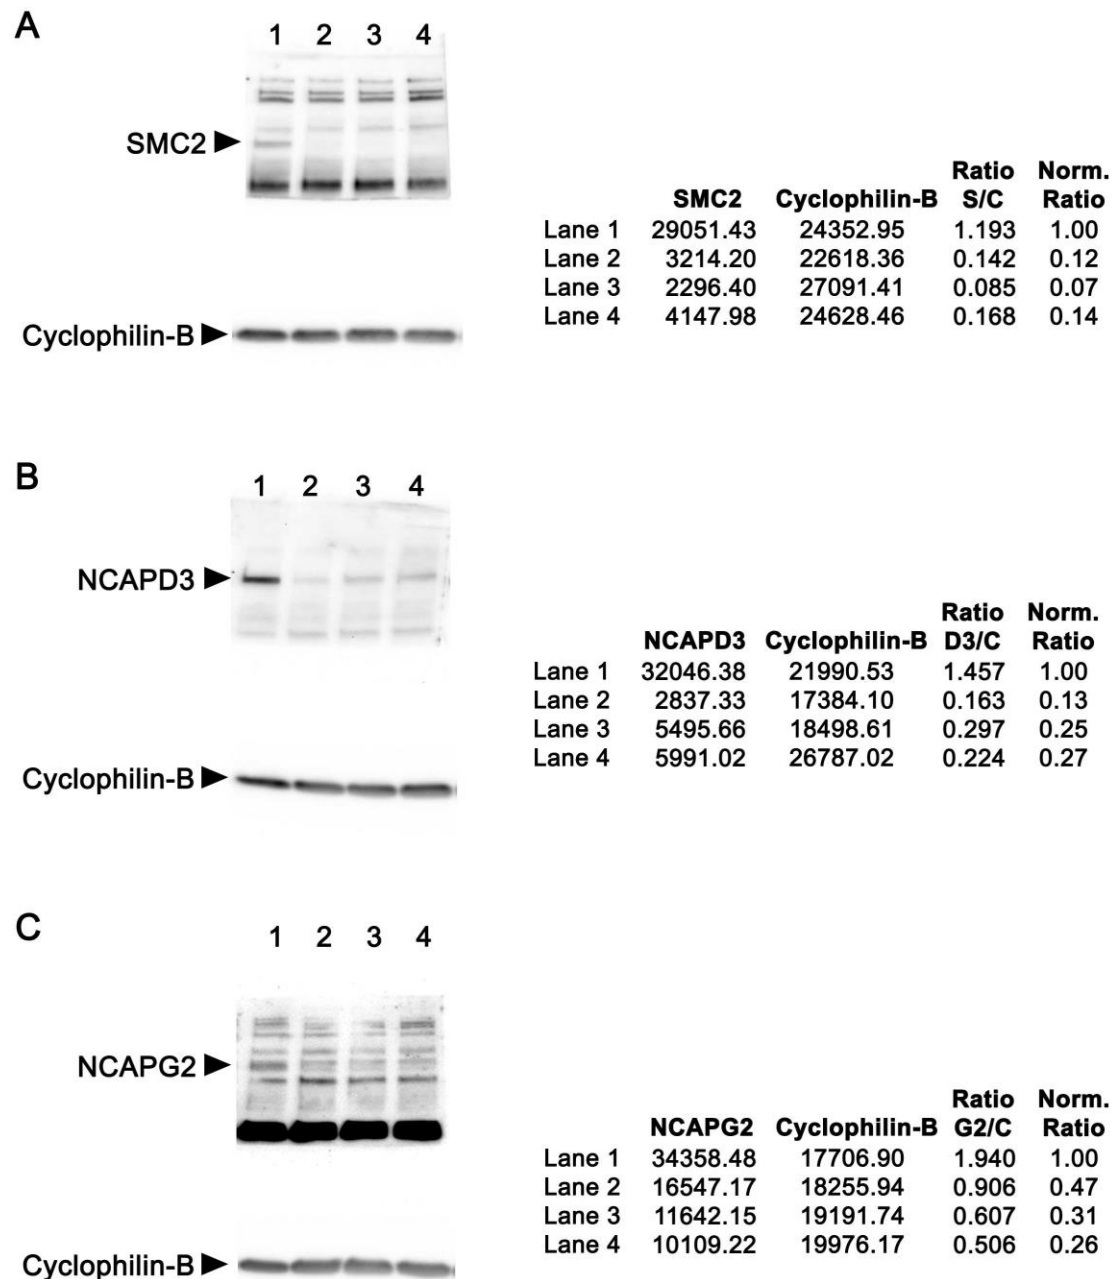

**Figure S2: Raw data of western blots from Figure 5.**

(A) Western blots of SMC2 (top) and Cyclophilin-B (bottom) in hTERT cells. Densitometry measurements are presented for SMC2 and Cyclophilin-B along with the SMC2/Cyclophilin-B ratios and normalized ratios, which are presented relative to the siControl (Lane 1). (B) Western blots of NCAPD3 (top) and Cyclophilin-B (bottom) in hTERT cells. Densitometry measurements are presented for NCAPD3 and Cyclophilin-B, while the SMC2/Cyclophilin-B ratios and normalized ratios, which are presented relative to the siControl (Lane 1). (C) Western blots of SMC2 (top) and Cyclophilin-B (bottom) in hTERT cells. Densitometry measurements are presented for SMC2 and Cyclophilin-B along with the SMC2/Cyclophilin-B ratios and normalized ratios, which are presented relative to the siControl (Lane 1).

**Figure S3: Establishing the Silencing Efficiencies of Condensin Gene Silencing in HCT116 Cells.**

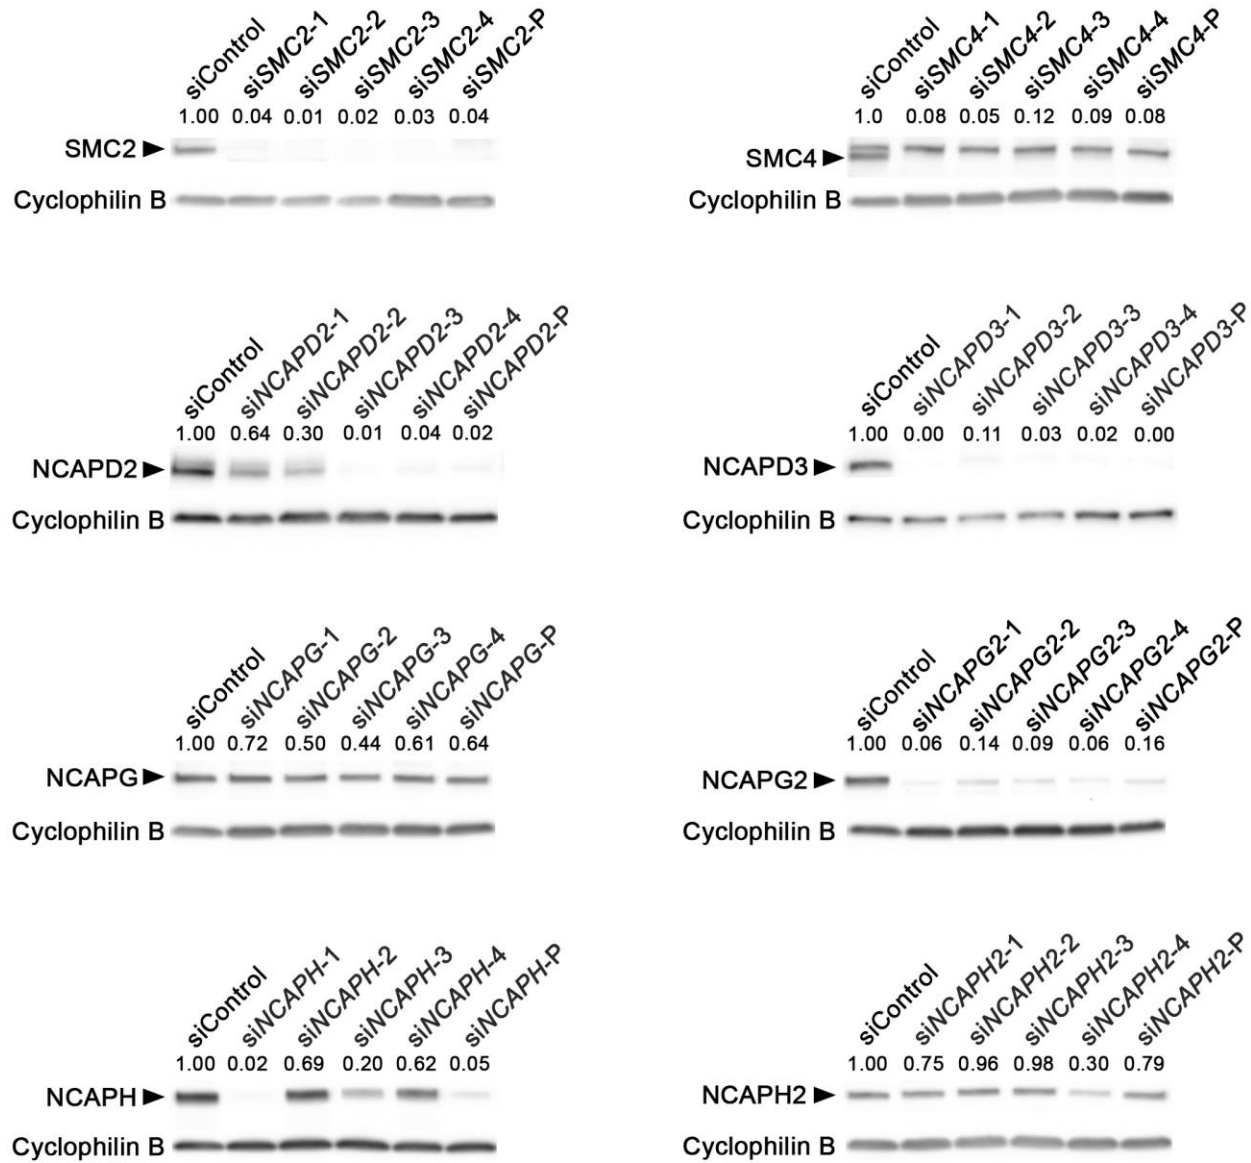

Western blots presenting the residual condensin protein levels (indicated) following silencing with either individual (siGene-1, -2, -3 or -4) or pooled (siGene-P) siRNA duplexes, with Cyclophilin B used as the loading control. Semi-quantitative image analyses were performed whereby residual protein levels were normalized to the respective loading control and are presented relative to the siControl for each gene (1.00).

**Figure S4: Assessing Residual Protein Expression Following Condensin Gene Silencing in hTERT Cells.**

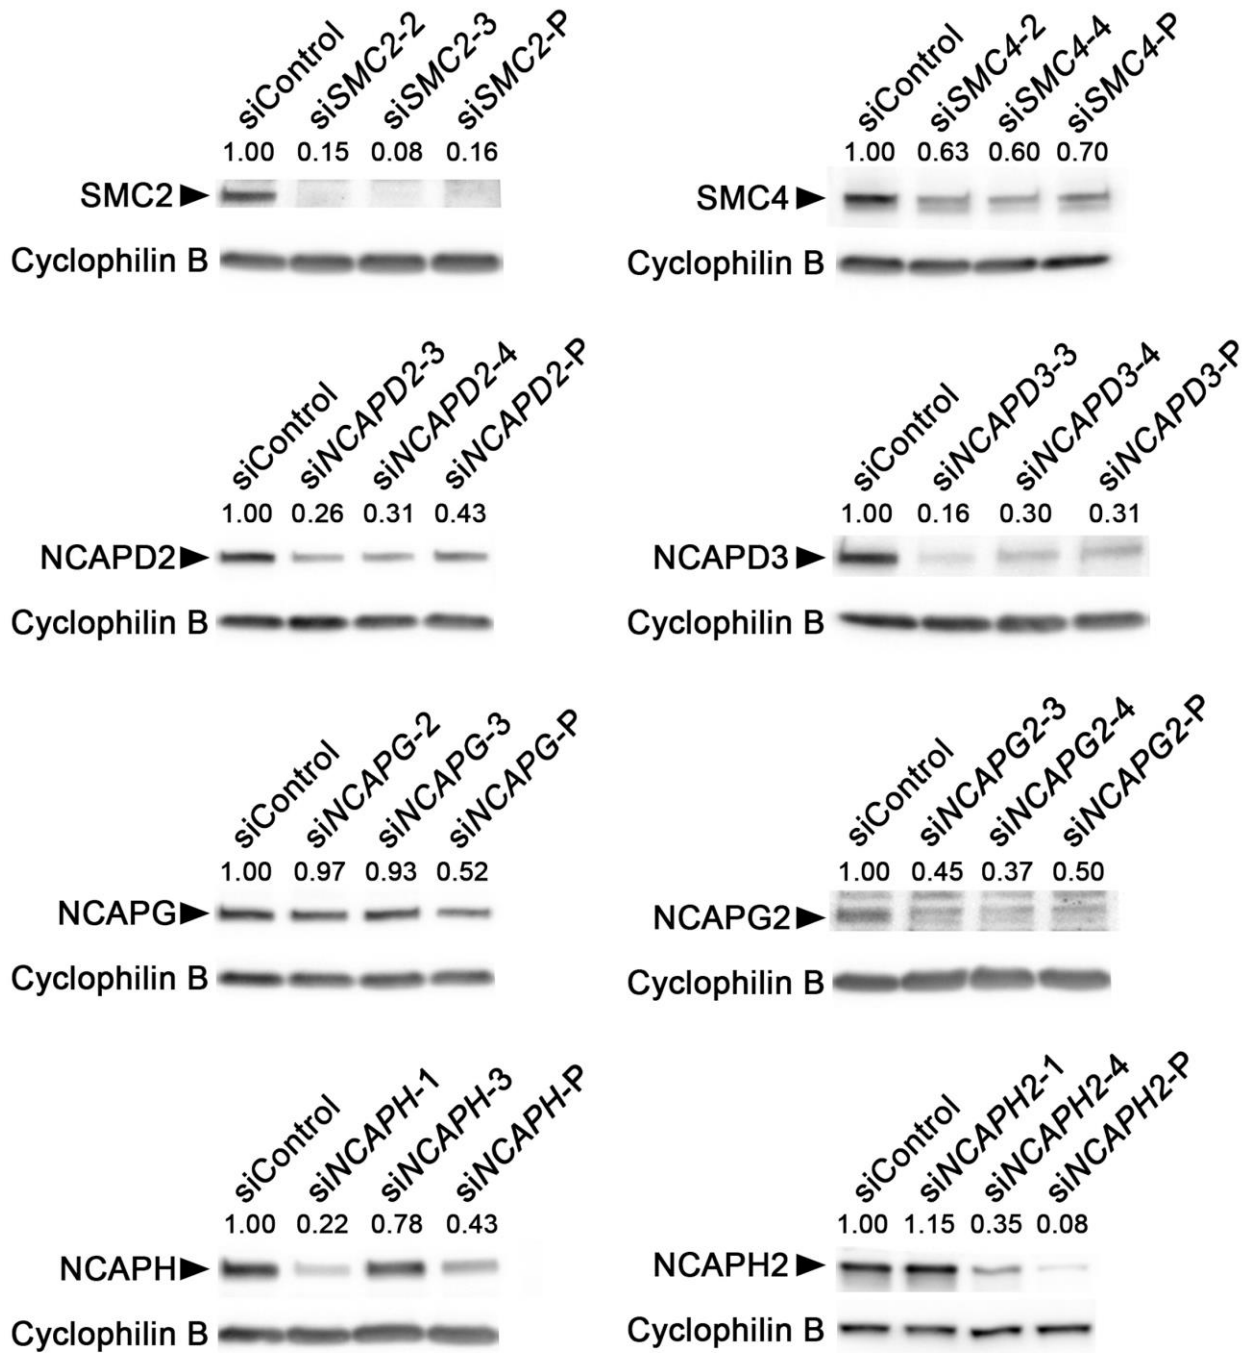

Western blots presenting the residual condensin protein levels (indicated) following silencing with the two most efficient individual (as determined in HCT116; see Supplementary Figure 1), or pooled (siGene-P) siRNA duplexes, with Cyclophilin B used as the loading control. Semi-quantitative image analyses were performed whereby residual protein levels were normalized to the respective loading control and are presented relative to the siControl for each gene (1.00).

## Supplementary Tables

**Table S1: Condensin Gene Silencing Corresponds with Significant Increases in the Cumulative Nuclear Area Distribution Frequencies in HCT116 Cells.**

| Cell Line | Condition  | N <sup>a</sup> | Mean  | Standard Deviation | Fold Increase <sup>b</sup> | CDF <i>p</i> <sup>c</sup> |
|-----------|------------|----------------|-------|--------------------|----------------------------|---------------------------|
| HCT116    | siControl  | 9360           | 172.6 | 62.2               | N/A                        | N/A                       |
|           | siSMC1A-P  | 3602           | 210.8 | 64.6               | 1.22                       | <0.0001                   |
|           | siSMC2-P   | 629            | 325.6 | 137.8              | 1.89                       | <0.0001                   |
|           | siSMC4-P   | 204            | 289.9 | 93.6               | 1.70                       | <0.0001                   |
|           | siNCAPD2-P | 2381           | 228.4 | 86.6               | 1.32                       | <0.0001                   |
|           | siNCAPD3-P | 5044           | 202.0 | 67.0               | 1.17                       | <0.0001                   |
|           | siNCAPH-P  | 3648           | 257.8 | 83.6               | 1.49                       | <0.0001                   |
|           | siNCAPH2-P | 1108           | 218.6 | 60.8               | 1.27                       | <0.0001                   |
|           | siNCAPG-P  | 487            | 224.0 | 82.5               | 1.30                       | <0.0001                   |
|           | siNCAPG2-P | 5237           | 218.6 | 79.1               | 1.27                       | <0.0001                   |

<sup>a</sup>Number (N) of nuclei analyzed.

<sup>b</sup>Fold increase in mean NA relative to siControl (not applicable; N/A).

<sup>c</sup>Two sample KS tests assessing differences in the cumulative distribution frequencies of NAs relative to siControl (N/A, not applicable);  $p = <0.01$  is considered statistically significant.

**Table S2: Condensin Gene Silencing Induces Increases in the MN Formation in HCT116 Cells.**

| <b>Cell Line</b> | <b>Condition</b> | <b>No. of Replicates<sup>a</sup></b> | <b>Mean</b> | <b>Standard Deviation</b> | <b>Fold Increase<sup>b</sup></b> |
|------------------|------------------|--------------------------------------|-------------|---------------------------|----------------------------------|
| HCT116           | siControl        | 6                                    | 0.418       | 0.059                     | N/A                              |
|                  | siSMC1A-P        | 6                                    | 3.487       | 1.047                     | 8.34                             |
|                  | siSMC2-P         | 6                                    | 4.082       | 2.309                     | 9.77                             |
|                  | siSMC4-P         | 6                                    | 5.217       | 3.827                     | 12.48                            |
|                  | siNCAPD2-P       | 6                                    | 3.442       | 1.190                     | 8.23                             |
|                  | siNCAPD3-P       | 6                                    | 0.990       | 0.313                     | 2.37                             |
|                  | siNCAPH-P        | 6                                    | 1.735       | 0.664                     | 4.15                             |
|                  | siNCAPH2-P       | 6                                    | 2.552       | 2.044                     | 6.11                             |
|                  | siNCAPG-P        | 6                                    | 3.893       | 7.296                     | 9.31                             |
|                  | siNCAPG2-P       | 6                                    | 1.567       | 0.865                     | 3.75                             |

<sup>a</sup>≥100 nuclei/replicate analyzed.

<sup>b</sup>Fold increase in mean MN formation relative to siControl (not applicable; N/A).

**Table S3: *SMC2* Silencing Corresponds with Significant Increases in the Cumulative NA Distribution Frequencies in HCT116.**

| <b>Cell Line</b> | <b>Condition</b>  | <b>N<sup>a</sup></b> | <b>Mean</b> | <b>Standard Deviation</b> | <b>Fold Increase<sup>b</sup></b> | <b>CDF <i>p</i><sup>c</sup></b> |
|------------------|-------------------|----------------------|-------------|---------------------------|----------------------------------|---------------------------------|
| HCT116           | siControl         | 200                  | 158.9       | 43.3                      | N/A                              | N/A                             |
|                  | si <i>SMC2</i> -2 | 200                  | 266.9       | 117.6                     | 1.7                              | <0.0001                         |
|                  | si <i>SMC2</i> -3 | 200                  | 248.5       | 95.3                      | 1.6                              | <0.0001                         |
|                  | si <i>SMC2</i> -P | 200                  | 339.2       | 136.0                     | 2.1                              | <0.0001                         |

<sup>a</sup>Number (N) of nuclei analyzed.

<sup>b</sup>Fold increase in mean NA relative to siControl (not applicable; N/A).

<sup>c</sup>Two sample KS test assessing differences in the cumulative distribution frequencies of NAs relative to siControl (N/A, not applicable);  $p = <0.01$  is considered statistically significant.

**Table S4: *SMC2* Silencing Corresponds with Significant Increases in the MN Formation in HCT116.**

| <b>Cell Line</b> | <b>Condition</b>  | <b>No. of Replicates<sup>a</sup></b> | <b>Mean</b> | <b>Standard Deviation</b> | <b>Fold Increase<sup>b</sup></b> |
|------------------|-------------------|--------------------------------------|-------------|---------------------------|----------------------------------|
| HCT116           | siControl         | 3                                    | 0.4333      | 0.0850                    | N/A                              |
|                  | si <i>SMC2</i> -2 | 3                                    | 5.3967      | 2.6799                    | 12.4                             |
|                  | si <i>SMC2</i> -3 | 3                                    | 4.1900      | 3.7280                    | 9.7                              |
|                  | si <i>SMC2</i> -P | 3                                    | 4.8333      | 1.6494                    | 11.2                             |

<sup>a</sup>≥100 nuclei/replicate analyzed.

<sup>b</sup>Fold increase in mean MN formation relative to siControl (not applicable; N/A).



**Table S5: Condensin Gene Silencing Induces Significant Changes in Cumulative Frequency Distributions for Chromosome Numbers in HCT116 Cells.**

| Cell Line | Condition | N <sup>a</sup> | Percentile       |                  |                  | Range  | CDF<br><i>p</i> <sup>b</sup> |
|-----------|-----------|----------------|------------------|------------------|------------------|--------|------------------------------|
|           |           |                | 25 <sup>th</sup> | 50 <sup>th</sup> | 75 <sup>th</sup> |        |                              |
| HCT116    | siControl | 100            | 45               | 45               | 45               | 41-90  | N/A                          |
|           | siSMC2-2  | 119            | 40               | 43               | 50               | 35-164 | <0.0001                      |
|           | siSMC2-3  | 112            | 39               | 42               | 51               | 32-166 | <0.0001                      |
|           | siSMC2-P  | 101            | 38               | 41               | 44               | 31-148 | <0.0001                      |

<sup>a</sup>Number (N) of enumerable mitotic chromosome spreads.

<sup>b</sup>Two sample KS tests assessing differences in the cumulative distribution frequencies of chromosome numbers relative to siControl (N/A, not applicable);  $p = <0.01$  is considered statistically significant.

**Table S6: Condensin Gene Silencing Induces Significant Changes in Cumulative Frequency Distributions for Chromosome Numbers in HCT116 Cells.**

| Cell Line | Condition  | N <sup>a</sup> | Percentile       |                  |                  | Range  | CDF<br><i>p</i> <sup>b</sup> |
|-----------|------------|----------------|------------------|------------------|------------------|--------|------------------------------|
|           |            |                | 25 <sup>th</sup> | 50 <sup>th</sup> | 75 <sup>th</sup> |        |                              |
| HCT116    | siControl  | 100            | 45               | 45               | 45               | 43-92  | N/A                          |
|           | siSMC2-P   | 60             | 38               | 41               | 44               | 31-148 | <0.0001                      |
|           | siSMC4-P   | 53             | 38               | 41               | 43               | 32-82  | <0.0001                      |
|           | siNCAPD2-P | 100            | 43               | 45               | 45               | 37-199 | 0.0008                       |
|           | siNCAPD3-P | 98             | 43               | 45               | 46               | 35-128 | <0.0001                      |
|           | siNCAPH-P  | 100            | 44               | 45               | 48               | 33-109 | <0.0001                      |
|           | siNCAPH2-P | 89             | 45               | 45               | 47               | 36-198 | 0.0006                       |
|           | siNCAPG-P  | 100            | 44               | 46               | 49               | 32-93  | <0.0001                      |
|           | siNCAPG2-P | 91             | 45               | 46               | 48               | 38-118 | <0.0001                      |

<sup>a</sup>Number (N) of enumerable mitotic chromosome spreads.

<sup>b</sup>Two sample KS tests assessing differences in the cumulative distribution frequencies of chromosome numbers relative to siControl (N/A, not applicable);  $p = <0.01$  is considered statistically significant.

**Table S7: Condensin Gene Silencing Corresponds with Significant Increases in the Cumulative Nuclear Area Distribution Frequencies in hTERT Cells.**

| Cell Line | Condition  | N <sup>a</sup> | Mean  | Standard Deviation | Fold Increase <sup>b</sup> | CDF <i>p</i> <sup>c</sup> |
|-----------|------------|----------------|-------|--------------------|----------------------------|---------------------------|
| hTERT     | siControl  | 1947           | 231.1 | 67.1               | N/A                        | N/A                       |
|           | siSMC1A-P  | 705            | 301.6 | 85.8               | 1.31                       | <0.0001                   |
|           | siSMC2-P   | 1338           | 278.6 | 80.8               | 1.21                       | <0.0001                   |
|           | siSMC4-P   | 2675           | 225.8 | 75.4               | 0.98                       | <0.0001                   |
|           | siNCAPD2-P | 2060           | 245.9 | 77.7               | 1.06                       | <0.0001                   |
|           | siNCAPD3-P | 2479           | 246.8 | 75.3               | 1.07                       | <0.0001                   |
|           | siNCAPH-P  | 1812           | 258.4 | 75.8               | 1.12                       | <0.0001                   |
|           | siNCAPH2-P | 1770           | 241.8 | 74.1               | 1.05                       | <0.0001                   |
|           | siNCAPG-P  | 2291           | 233.1 | 72.5               | 1.01                       | 0.0711                    |
|           | siNCAPG2-P | 2118           | 243.2 | 74.5               | 1.05                       | <0.0001                   |

<sup>a</sup>Number (N) of nuclei analyzed.

<sup>b</sup>Fold increase in mean NA relative to siControl (not applicable; N/A).

<sup>c</sup>Two sample KS tests assessing differences in the cumulative distribution frequencies of NAs relative to siControl (N/A, not applicable);  $p = <0.01$  is considered statistically significant.

**Table S8: Condensin Gene Silencing Induces Increases in the MN Formation in hTERT Cells.**

| <b>Cell Line</b> | <b>Condition</b> | <b>No. of Replicates<sup>a</sup></b> | <b>Mean</b> | <b>Standard Deviation</b> | <b>Fold Increase<sup>b</sup></b> |
|------------------|------------------|--------------------------------------|-------------|---------------------------|----------------------------------|
| hTERT            | siControl        | 6                                    | 0.978       | 0.364                     | N/A                              |
|                  | siSMC1A-P        | 6                                    | 1.798       | 1.148                     | 1.84                             |
|                  | siSMC2-P         | 6                                    | 3.358       | 0.804                     | 3.43                             |
|                  | siSMC4-P         | 6                                    | 1.598       | 0.618                     | 1.63                             |
|                  | siNCAPD2-P       | 6                                    | 1.477       | 0.640                     | 1.51                             |
|                  | siNCAPD3-P       | 6                                    | 2.730       | 1.234                     | 2.79                             |
|                  | siNCAPH-P        | 6                                    | 0.832       | 0.579                     | 0.85                             |
|                  | siNCAPH2-P       | 6                                    | 1.240       | 0.556                     | 1.27                             |
|                  | siNCAPG-P        | 6                                    | 1.163       | 0.316                     | 1.19                             |
|                  | siNCAPG2-P       | 6                                    | 2.382       | 1.444                     | 2.44                             |

<sup>a</sup>≥100 nuclei/replicate analyzed.

<sup>b</sup>Fold increase in mean MN formation relative to siControl (not applicable; N/A).

**Table S9: Condensin Gene Silencing Induces Increases in the MN Formation in hTERT Cells.**

| Cell Line | Condition  | N <sup>a</sup> | Percentile       |                  |                  | Range  | CDF<br><i>p</i> <sup>b</sup> |
|-----------|------------|----------------|------------------|------------------|------------------|--------|------------------------------|
|           |            |                | 25 <sup>th</sup> | 50 <sup>th</sup> | 75 <sup>th</sup> |        |                              |
| hTERT     | siControl  | 100            | 46               | 46               | 46               | 41-92  | N/A                          |
|           | siSMC2-P   | 17             | 46               | 48               | 55               | 32-88  | <0.0001                      |
|           | siNCAPD3-P | 100            | 46               | 50               | 53               | 38-104 | <0.0001                      |
|           | siNCAPG2-P | 100            | 45               | 46               | 51               | 31-98  | <0.0001                      |

<sup>a</sup>Number (N) of enumerable mitotic chromosome spreads.

<sup>b</sup>Two sample KS tests assessing differences in the cumulative distribution frequencies of chromosome numbers relative to siControl (N/A, not applicable);  $p = <0.01$  is considered statistically significant.
